# Supplementary material for: Tongue Coating Microbiota Community and Risk Effect on Gastric Cancer
Source: PubMed Central journal article supplement — J Cancer. 2018 Oct 17;9(21):4039–48. doi: 10.7150/jca.25280 (PMC6218773; doi:10.7150/jca.25280), 2018-10-17

Figure S1. Bootstrap for the main significant results for two phyla and five genera in 1,000 simulations.

The W statistic denotes the Wilcoxon rank tests statistic, and  $P$  value less than 0.05 was marked below the purple line.

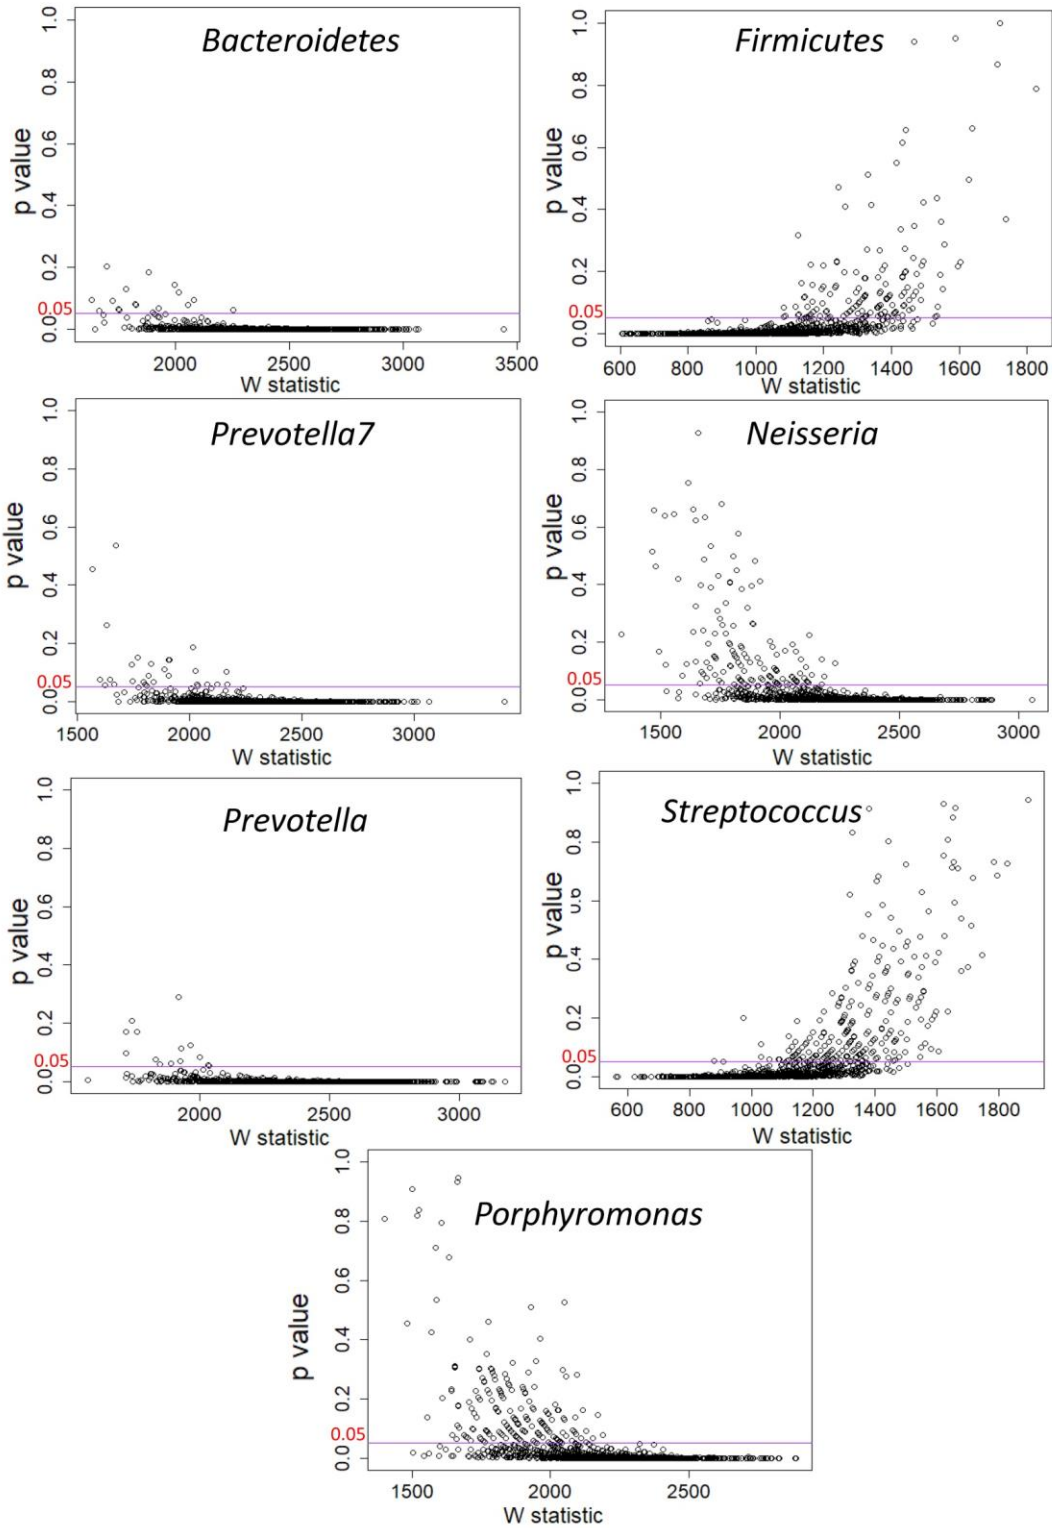

Supplement: jcav09p4039s1.pdf [file jcav09p4039s1.pdf]
